# Supplementary material for: Impact of New York State’s Health Home program on access to care among patients with diabetes
Source: PubMed Central journal article supplement — BMJ Open Diabetes Res Care. 2021 Dec 15;9(Suppl 1):e002204. doi: 10.1136/bmjdrc-2021-002204 (PMC8679110; doi:10.1136/bmjdrc-2021-002204), 2021-12-15
Supplement: bmjdrc-2021-002204supp001.pdf [file bmjdrc-2021-002204supp001.pdf]

Supplementary Table 1. Health Home impact results controlling for months enrolled in Medicaid in the follow-up period

| Outcome                                                                             | Program group |                                       |        | Comparison group |                                       |        | Impact (95% CI)         | P-value | Effect size (Cohen's d) |
|-------------------------------------------------------------------------------------|---------------|---------------------------------------|--------|------------------|---------------------------------------|--------|-------------------------|---------|-------------------------|
|                                                                                     | Pre-period    | Post-period (adjusted for pre-period) | N      | Pre-period       | Post-period (adjusted for pre-period) | N      |                         |         |                         |
| Mean outpatient visits                                                              | 21.3          | 22.1                                  | 11,646 | 21.3             | 19.5                                  | 26,601 | 2.6<br>(1.9, 3.3)       | <.001   | 0.110                   |
| Mean primary care visits                                                            | 10.1          | 10.4                                  | 11,646 | 10.1             | 9.2                                   | 26,601 | 1.2<br>(0.8, 1.7)       | <.001   | 0.084                   |
| Mean specialty care visits                                                          | 11.2          | 11.6                                  | 11,646 | 11.2             | 10.4                                  | 26,601 | 1.3<br>(0.9, 1.7)       | <.001   | 0.084                   |
| Proportion with 1+ inpatient stays                                                  | 0.41          | 0.41                                  | 11,646 | 0.41             | 0.35                                  | 26,601 | 0.05<br>(0.04, 0.06)    | <.001   | 0.146                   |
| Proportion of inpatient stays with outpatient follow-up within 7 days <sup>1</sup>  | 0.28          | 0.46                                  | 4,831  | 0.29             | 0.44                                  | 7,541  | 0.02<br>(-0.00, 0.04)   | 0.069   | 0.041                   |
| Proportion of inpatient stays with outpatient follow-up within 30 days <sup>1</sup> | 0.46          | 0.75                                  | 4,831  | 0.48             | 0.73                                  | 7,541  | 0.02<br>(0.01, 0.04)    | 0.003   | 0.063                   |
| Proportion with 1+ ED visits                                                        | 0.35          | 0.36                                  | 11,646 | 0.35             | 0.32                                  | 26,601 | 0.04<br>(0.03, 0.05)    | <.001   | 0.115                   |
| Proportion of ED visits with outpatient follow-up within 7 days <sup>2</sup>        | 0.23          | 0.42                                  | 4,372  | 0.24             | 0.41                                  | 6,543  | 0.02<br>(-0.01, 0.04)   | 0.150   | 0.035                   |
| Proportion of ED visits with outpatient follow-up within 30 days <sup>2</sup>       | 0.39          | 0.74                                  | 4,372  | 0.42             | 0.71                                  | 6,543  | 0.03<br>(0.01, 0.05)    | 0.002   | 0.071                   |
| Mean COC index <sup>3</sup>                                                         | 0.43          | 0.51                                  | 9,012  | 0.45             | 0.51                                  | 16,569 | -0.00<br>(-0.01, 0.01)  | 0.592   | -0.008                  |
| Mean UPC index <sup>4</sup>                                                         | 0.63          | 0.70                                  | 9,906  | 0.64             | 0.71                                  | 19,167 | -0.01<br>(-0.02, -0.00) | 0.002   | -0.045                  |

ED = Emergency Department

UPC = Usual Provider of Care

COC = Continuity of Care

"Visits" were defined as the number of unique combinations of provider ID, Medicaid ID, and dates within the baseline or follow-up period.

Models of 7-day and 30-day follow-ups on ER visits or hospital stays included only those patients that experienced an ER visit or a hospital stay.

Impact models of UPC and COC indices include only those observations for which the index is defined. UPC indices are undefined for patients with less than 2 visits, and COC indices are undefined for patients with less than 1 visit.

<sup>1</sup>Included N = all patients with at least one hospital stay in the 12-month follow-up period.

<sup>2</sup>Included N = all patients with at least ED visit in the 12-month follow-up period.

<sup>3</sup>Included N = all patients with at least two outpatient visits in the 12-month follow-up period.

<sup>4</sup>Included N = all patients with at least one outpatient visit in the 12-month follow-up period.
